# Supplementary material for: Effects of Linoleic Acid on Gut-Derived Bifidobacterium breve DSM 20213: A Transcriptomic Approach
Source: PubMed Central journal article supplement (PMC6955684; doi:10.3390/microorganisms7120710), 2019-12-17
Supplement: microorganisms-07-00710-s001.pdf [file microorganisms-07-00710-s001.pdf]

# Effects of Linoleic Acid on Gut-Derived *Bifidobacterium breve* DSM 20213: A Transcriptomic Approach

Alice Senizza, Maria Luisa Callegari, Biancamaria Senizza, Andrea Minuti, Gabriele Rocchetti, Lorenzo Morelli and Vania Patrone

**Table S1.** Genes with a fold change (FC) of  $\geq 2$  in *B. breve* DSM 20213 following exposure to linoleic acid.

| Locus tag                                    | Protein and predicted functions                                                         | FC |
|----------------------------------------------|-----------------------------------------------------------------------------------------|----|
| <b>Catalytic activity</b>                    |                                                                                         |    |
| BBRE_1751                                    | ATP-binding protein of ABC transporter system                                           | 3  |
| BBRE_1858                                    | Hypothetical protein with DUF488 domain                                                 | 3  |
| BBRE_1404                                    | Cystathionine beta-lyase, metC                                                          | 3  |
| BBRE_1752                                    | ATP-binding protein of ABC transporter system                                           | 3  |
| BBRE_1663                                    | ATP-binding protein of ABC transporter system                                           | 3  |
| BBRE_1435                                    | ATP-binding Mrp-like protein                                                            | 3  |
| BBRE_0906                                    | Trypsin-like serine protease                                                            | 2  |
| BBRE_0490                                    | AAA family ATPase                                                                       | 2  |
| BBRE_0126                                    | Aspartate aminotransferase                                                              | 2  |
| <b>Cofactor binding</b>                      |                                                                                         |    |
| BBRE_1008                                    | Hypothetical protein                                                                    | 2  |
| <b>Integral component of membrane</b>        |                                                                                         |    |
| BBRE_1753                                    | ATP-binding protein of ABC transporter system                                           | 4  |
| BBRE_1007                                    | ATP-binding protein of ABC transporter system                                           | 3  |
| BBRE_1002                                    | Membrane-spanning protein with iron permease FTR1 family domain                         | 3  |
| BBRE_1613                                    | Hypothetical protein                                                                    | 3  |
| BBRE_1006                                    | Permease protein of ABC transporter system                                              | 3  |
| BBRE_1662                                    | Permease protein of ABC transporter system                                              | 3  |
| BBRE_0214                                    | Membrane-spanning protein                                                               | 3  |
| BBRE_1661                                    | Membrane-spanning protein                                                               | 3  |
| BBRE_1905                                    | Hypothetical protein                                                                    | 3  |
| BBRE_0844                                    | Membrane-spanning protein                                                               | 3  |
| BBRE_0413                                    | DedA family protein                                                                     | 3  |
| BBRE_1655                                    | Secreted protein                                                                        | 2  |
| BBRE_1005                                    | Permease protein of ABC transporter system                                              | 2  |
| BBRE_1004                                    | Membrane-spanning protein                                                               | 2  |
| BBRE_0473                                    | Membrane-spanning protein                                                               | 2  |
| BBRE_0895                                    | Esterase                                                                                | 2  |
| BBRE_0356                                    | Membrane-spanning protein                                                               | 2  |
| BBRE_0896                                    | Lysyl-cardiolipin synthase/Lysyl-transferase, mprF                                      | 2  |
| BBRE_1056                                    | ATP-binding protein of ABC transporter system                                           | 2  |
| BBRE_0149                                    | Transporter MFS superfamily                                                             | 2  |
| BBRE_1895                                    | ComE operon protein 3                                                                   | 2  |
| BBRE_0687                                    | Membrane-spanning protein                                                               | 2  |
| <b>Regulator iron-sulfur cluster binding</b> |                                                                                         |    |
| BBRE_1505                                    | WhiB protein, WblE                                                                      | 3  |
| <b>Transport</b>                             |                                                                                         |    |
| BBRE_1003                                    | Secreted protein, probably involved in iron uptake                                      | 4  |
| BBRE_1612                                    | Hypothetical protein with methyl transferase domain                                     | 4  |
| BBRE_1184                                    | ATP-binding and permease modules of ABC transporter system                              | 2  |
| BBRE_1621                                    | Multidrug resistance protein B, MFS member, bile efflux induced upon bile salt exposure | 2  |

| <b>Locus tag</b>                      | <b>Protein and predicted functions</b>                                                                                                     | <b>FC</b> |
|---------------------------------------|--------------------------------------------------------------------------------------------------------------------------------------------|-----------|
| <b>Oxidation-reduction process</b>    |                                                                                                                                            |           |
| BBRE_1111                             | Aspartate ammonia-lyase                                                                                                                    | 2         |
| BBRE_0908                             | Ferredoxin-NADP reductase                                                                                                                  | 2         |
| <b>Metabolic process</b>              |                                                                                                                                            |           |
| BBRE_0631                             | Thiamin pyrophosphokinase                                                                                                                  | 2         |
| BBRE_1654                             | Pyrazinamidase/Nicotinamidase                                                                                                              | 2         |
| BBRE_0414                             | AAA family ATPase                                                                                                                          | 2         |
| <b>Transcriptional regulator</b>      |                                                                                                                                            |           |
| BBRE_1614                             | PEMK-like protein                                                                                                                          | 2         |
| BBRE_0144                             | Transcriptional regulator                                                                                                                  | 2         |
| BBRE_0680                             | Transcriptional regulator                                                                                                                  | 2         |
| BBRE_0529                             | Hypothetical protein with ATP cone domain                                                                                                  | 2         |
| <b>Cell division</b>                  |                                                                                                                                            |           |
| BBRE_0750                             | Cell division protein, Fic                                                                                                                 | 2         |
| <b>Others</b>                         |                                                                                                                                            |           |
| BBRE_1859                             | Hypothetical protein                                                                                                                       | 3         |
| BBRE_1615                             | Hypothetical protein                                                                                                                       | 2         |
| BBRE_1620                             | Hypothetical protein                                                                                                                       | 2         |
| BBRE_1710                             | Hypothetical protein                                                                                                                       | 3         |
| BBRE_0681                             | Hypothetical protein                                                                                                                       | 2         |
| BBRE_1688                             | Hypothetical protein with DUF59 domain                                                                                                     | 2         |
| <b>Integral component of membrane</b> |                                                                                                                                            |           |
| BBRE_0275                             | Histidine kinase sensor of two-component system                                                                                            | -3        |
| BBRE_1629                             | Glucose/fructose transport protein                                                                                                         | -3        |
| BBRE_0277                             | Membrane spanning protein                                                                                                                  | -3        |
| BBRE_0276                             | Membrane spanning protein with PspC domain                                                                                                 | -3        |
| BBRE_0949                             | TadE-like protein                                                                                                                          | -3        |
| BBRE_1084                             | Secreted protein with prokaryotic membrane lipoprotein lipid attachment site and Gram-positive cocci surface proteins, LPxTG motif profile | -2        |
| BBRE_0011                             | Membrane-spanning protein                                                                                                                  | -2        |
| BBRE_0727                             | Glycoside hydrolase                                                                                                                        | -2        |
| BBRE_1140                             | Hypothetical protein                                                                                                                       | -2        |
| BBRE_1313                             | Permease protein of ABC transporter system                                                                                                 | -2        |
| BBRE_0032                             | ATP-binding and permease protein of ABC multidrug transporter system                                                                       | -2        |
| BBRE_1101                             | Translation initiation inhibitor                                                                                                           | -2        |
| <b>Carbohydrates transport</b>        |                                                                                                                                            |           |
| BBRE_0799                             | PTS system IIC component                                                                                                                   | -3        |
| BBRE_0801                             | PTS system IIA component                                                                                                                   | -2        |
| BBRE_0986                             | Phosphoenolpyruvate-protein phosphotransferase                                                                                             | -2        |
| BBRE_0800                             | PTS system IIB component                                                                                                                   | -2        |
| BBRE_0419                             | PTS system fructose-like IIB component                                                                                                     | -2        |
| BBRE_0263                             | PTS system fructose/glucose-specific IIABC component                                                                                       | -2        |
| BBRE_0985                             | Phosphocarrier protein HPr                                                                                                                 | -2        |
| BBRE_0797                             | Sugar ABC transporter ATP-binding protein                                                                                                  | -2        |
| BBRE_0195                             | Sugar-binding protein of ABC transporter system                                                                                            | -2        |
| BBRE_0007                             | Sugar ABC transporter solute-binding protein                                                                                               | -2        |
| <b>Transport</b>                      |                                                                                                                                            |           |
| BBRE_0648                             | ATP-binding protein of ABC transporter system                                                                                              | -3        |
| BBRE_0306                             | Solute-binding protein of ABC transporter system (lactose)                                                                                 | -3        |
| BBRE_0417                             | Nitrogen regulatory IIA (Enzyme IIA-NTR) (Phosphotransferase enzyme II A component)                                                        | -2        |
| BBRE_0813                             | Potassium channel protein                                                                                                                  | -2        |
| BBRE_0767                             | Permease protein of raffinose transport system                                                                                             | -2        |
| BBRE_0196                             | Permease protein of ABC transporter system                                                                                                 | -2        |
| BBRE_1175                             | Permease protein of ABC transporter system                                                                                                 | -2        |
| BBRE_0270                             | Sugar ABC transporter permease protein                                                                                                     | -2        |

|                                                                     |                                                       |    |
|---------------------------------------------------------------------|-------------------------------------------------------|----|
| BBRE_0931                                                           | Maltodextrin transport system permease protein, malC  | -2 |
| BBRE_0768                                                           | Permease protein of raffinose transport system        | -2 |
| BBRE_1185                                                           | Sugar ABC transporter solute-binding protein          | -2 |
| BBRE_0010                                                           | Sugar ABC transporter permease protein                | -2 |
| BBRE_0115                                                           | Transporter member of MFS, possible L-fucose permease | -2 |
| BBRE_0967                                                           | Oligopeptide transport system permease protein, oppB  | -2 |
| BBRE_0269                                                           | Sugar ABC transporter permease protein                | -2 |
| BBRE_0197                                                           | Sugar ABC transporter permease protein                | -2 |
| BBRE_1372                                                           | ABC transporter permease                              | -2 |
| BBRE_0171                                                           | Guanine-hypoxanthine permease                         | -2 |
| BBRE_0966                                                           | Oligopeptide-binding protein, oppA                    | -2 |
| <b>Metabolic process</b>                                            |                                                       |    |
| BBRE_1630                                                           | Sulfatase family protein                              | -2 |
| BBRE_1312                                                           | Membrane-spanning protein, possible ABC-type permease | -2 |
| BBRE_1543                                                           | Phosphate acetyltransferase                           | -2 |
| BBRE_1000                                                           | Glutamyl-tRNA synthetase                              | -3 |
| BBRE_0206                                                           | Zinc-dependent alcohol dehydrogenase family protein   | -2 |
| BBRE_0506                                                           | Mandelate racemase                                    | -2 |
| BBRE_0315                                                           | Lactaldehyde reductase                                | -2 |
| BBRE_0965                                                           | Hydrolase                                             | -2 |
| BBRE_0547                                                           | Anhydro-N-acetylmuramyl-tripeptide amidase            | -2 |
| <b>Lipid biosynthetic and metabolic process</b>                     |                                                       |    |
| BBRE_0138                                                           | Acetyl-/propionyl-CoA carboxylase beta chain          | -2 |
| BBRE_0137                                                           | Acetyl-/propionyl-CoA carboxylase alpha chain         | -2 |
| BBRE_0314                                                           | Cyclopropane-fatty-acyl-phospholipid synthase         | -2 |
| BBRE_0997                                                           | Carboxy-cis,cis-muconate                              | -2 |
| BBRE_0507                                                           | Short-chain dehydrogenase                             | -2 |
| <b>Molecular function</b>                                           |                                                       |    |
| BBRE_1001                                                           | DNA integrase                                         | -3 |
| BBRE_1548                                                           | DNA helicase II                                       | -2 |
| <b>Carbohydrates metabolic process</b>                              |                                                       |    |
| BBRE_0929                                                           | Alpha-glucosidase                                     | -2 |
| BBRE_0480                                                           | Beta-fructofuranosidase                               | -2 |
| BBRE_1628                                                           | Aldose 1-epimerase family protein                     | -2 |
| BBRE_1922                                                           | N-acetylmannosamine-6-phosphate 2-epimerase           | -2 |
| BBRE_0271                                                           | Lacto-N-biose phosphorylase                           | -2 |
| BBRE_0611                                                           | PfkB family carbohydrate kinase                       | -2 |
| <b>Branched chain amino-acid biosynthesis and metabolic process</b> |                                                       |    |
| BBRE_0088                                                           | 3-isopropylmalate dehydratase small subunit           | -2 |
| BBRE_0087                                                           | 3-isopropylmalate dehydratase large subunit           | -2 |
| <b>Regulation of biological process</b>                             |                                                       |    |
| BBRE_0097                                                           | NADH oxidase H <sub>2</sub> O-forming                 | -2 |
| <b>Regulator</b>                                                    |                                                       |    |
| BBRE_0798                                                           | Transcriptional regulator, GntR family                | -2 |
| BBRE_0716                                                           | WhiB family transcriptional regulator                 | -2 |
| BBRE_0274                                                           | Response regulator of two-component system            | -2 |
| BBRE_0718                                                           | Macrolide ABC transporter ATP-binding protein         | -2 |
| BBRE_0770                                                           | Transcriptional repressor, ROK family                 | -2 |
| BBRE_0017                                                           | Transcriptional regulator, MarR family                | -2 |
| BBRE_0715                                                           | WhiB family transcriptional regulator                 | -2 |
| <b>Protein folding</b>                                              |                                                       |    |
| BBRE_0182                                                           | 10-kDa chaperonin, GroES                              | -2 |
| BBRE_0440                                                           | 60-kDa chaperonin, GroEL                              | -2 |
| <b>DNA replication and cell division</b>                            |                                                       |    |
| BBRE_0806                                                           | Ribonucleoside-diphosphate reductase alpha chain      | -2 |
| BBRE_0717                                                           | DNA partition protein                                 | -2 |

| <b>DNA recombination</b>           |                                                                                                                         |    |
|------------------------------------|-------------------------------------------------------------------------------------------------------------------------|----|
| BBRE_0738                          | Mobilization protein                                                                                                    | -2 |
| BBRE_1307                          | Transposase                                                                                                             | -2 |
| <b>Oxidation-reduction process</b> |                                                                                                                         |    |
| BBRE_0139                          | Type I multifunctional fatty acid synthase                                                                              | -2 |
| <b>Other</b>                       |                                                                                                                         |    |
| BBRE_0742                          | Hypothetical protein                                                                                                    | -2 |
| BBRE_1919                          | Appr-1-p processing protein                                                                                             | -2 |
| BBRE_0743                          | Hypothetical protein                                                                                                    | -3 |
| BBRE_1100                          | Hypothetical protein                                                                                                    | -2 |
| BBRE_0089                          | Hypothetical protein                                                                                                    | -2 |
| BBRE_1335                          | Hypothetical protein                                                                                                    | -2 |
| BBRE_0744                          | Hypothetical protein                                                                                                    | -2 |
| BBRE_1129                          | Secreted protein with Gram-positive cocci surface proteins, LPxTG motif profile and Von Willebrand factor type A domain | -2 |
| BBRE_1183                          | Hypothetical protein                                                                                                    | -2 |
| BBRE_0734                          | Hypothetical protein                                                                                                    | -2 |
| BBRE_1547                          | Toxin-antitoxin system antitoxin component, Xre family                                                                  | -3 |

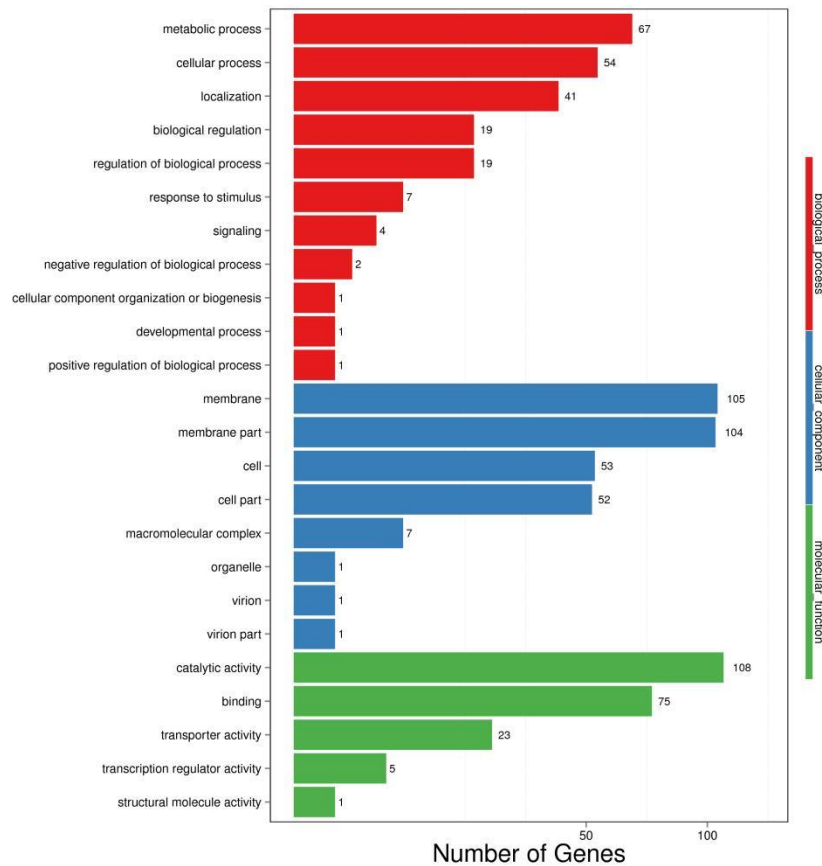

**Figure S1.** Gene Ontology (GO) functional classification of differentially expressed genes. The three main categories are reported: molecular biological function, cellular components, and biological processes.

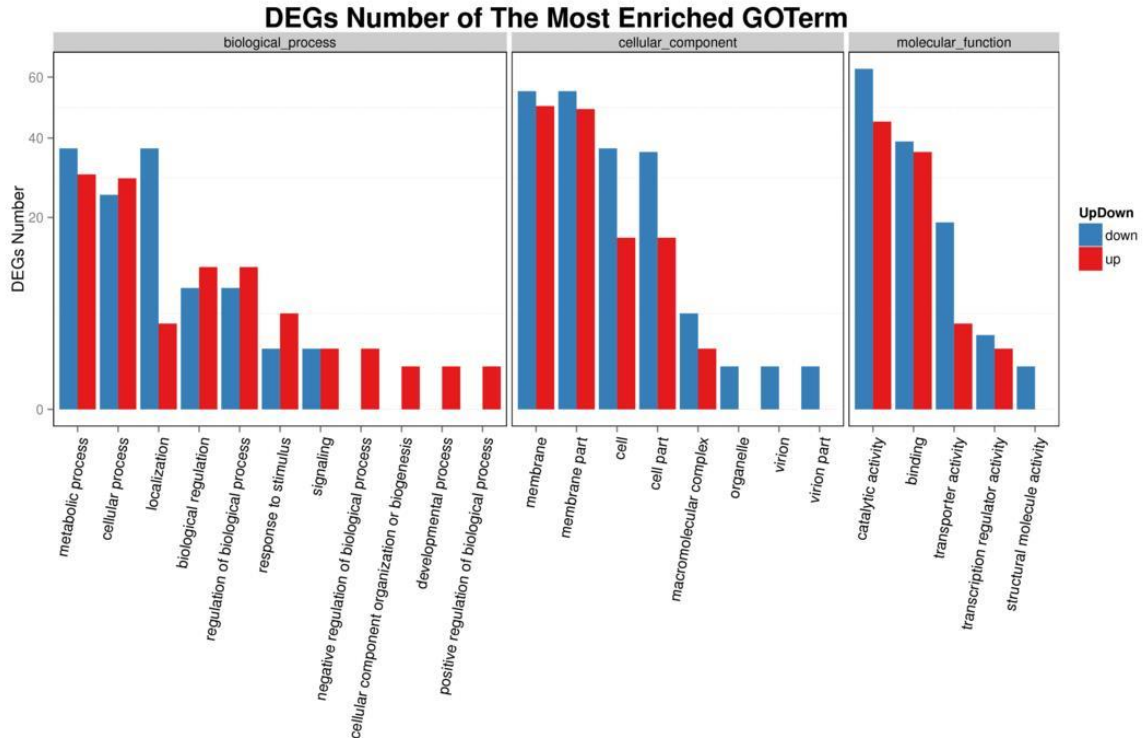

**Figure S2.** The Gene Ontology (GO) classification of upregulated genes (red) and downregulated genes (blue) in *B. breve* DSM 20213 grown in MRS-cys. compared to MRS-cys-LA.

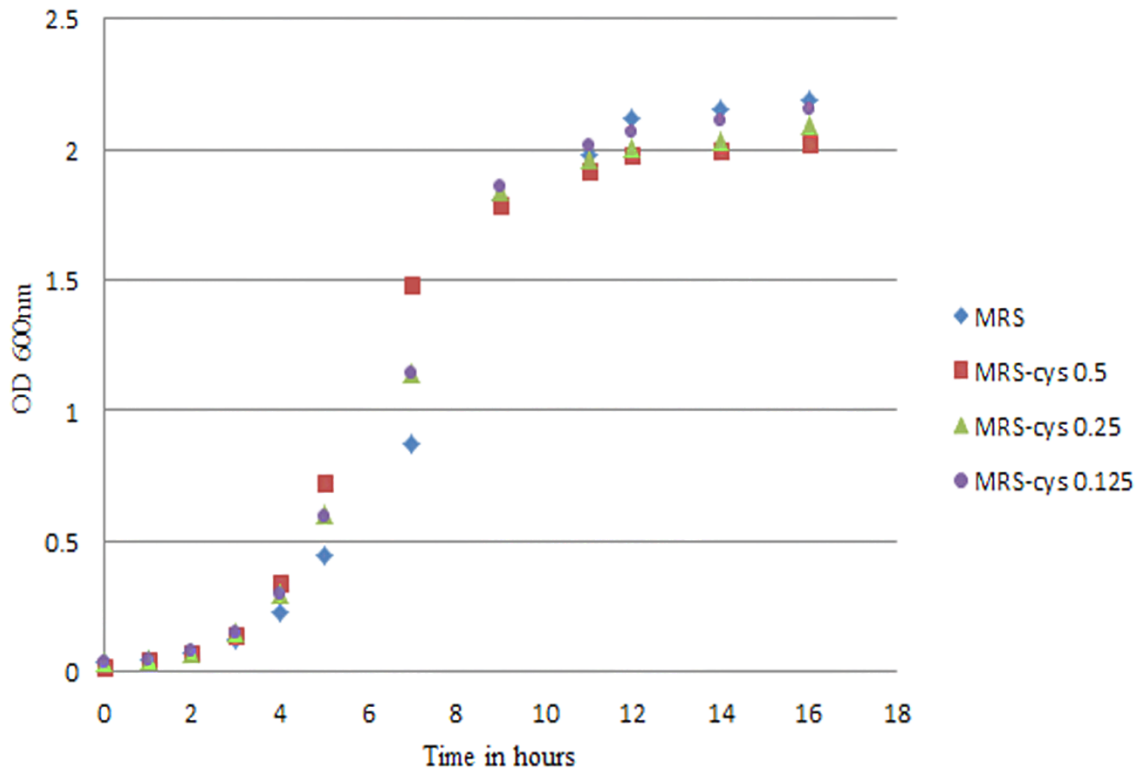

**Figure S3.** Growth curves of *B. breve* DSM 20213 grown in MRS-cys containing different concentrations of cysteine. Optical density was measured at 600 nm. No statistically significant differences ( $p > 0.05$ ) were found between the growth curves of *B. breve* at different cysteine concentrations.

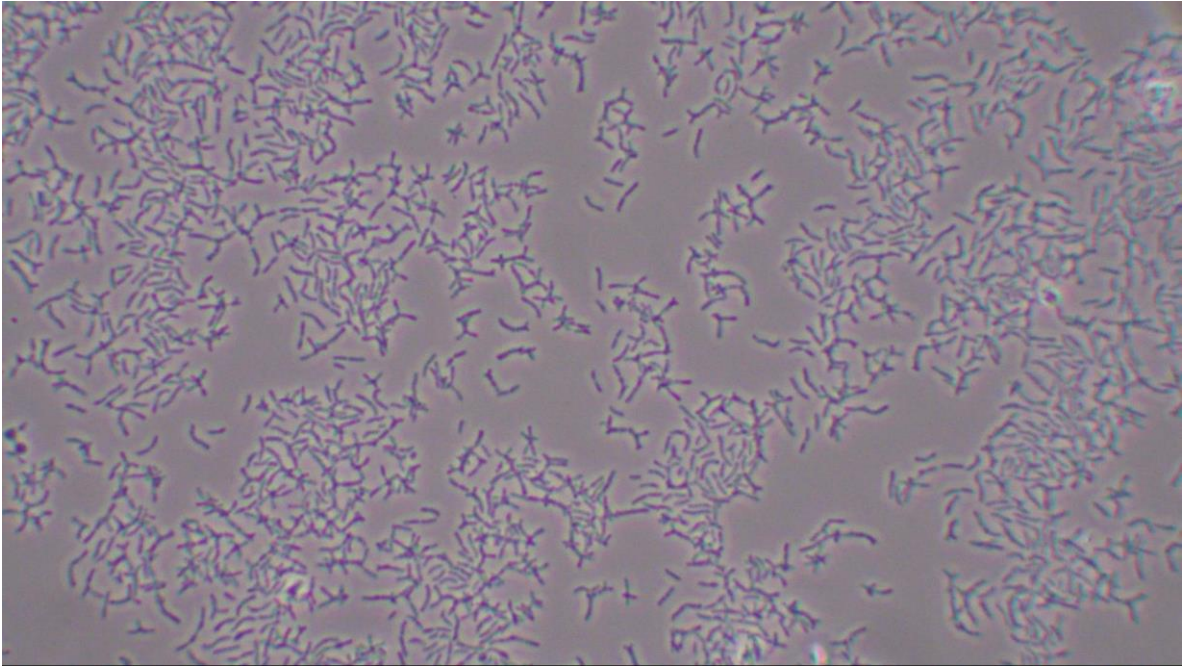

**Figure S4a.** Optical microscope observation of *B. breve* DSM 20213 grown in MRS-cys.

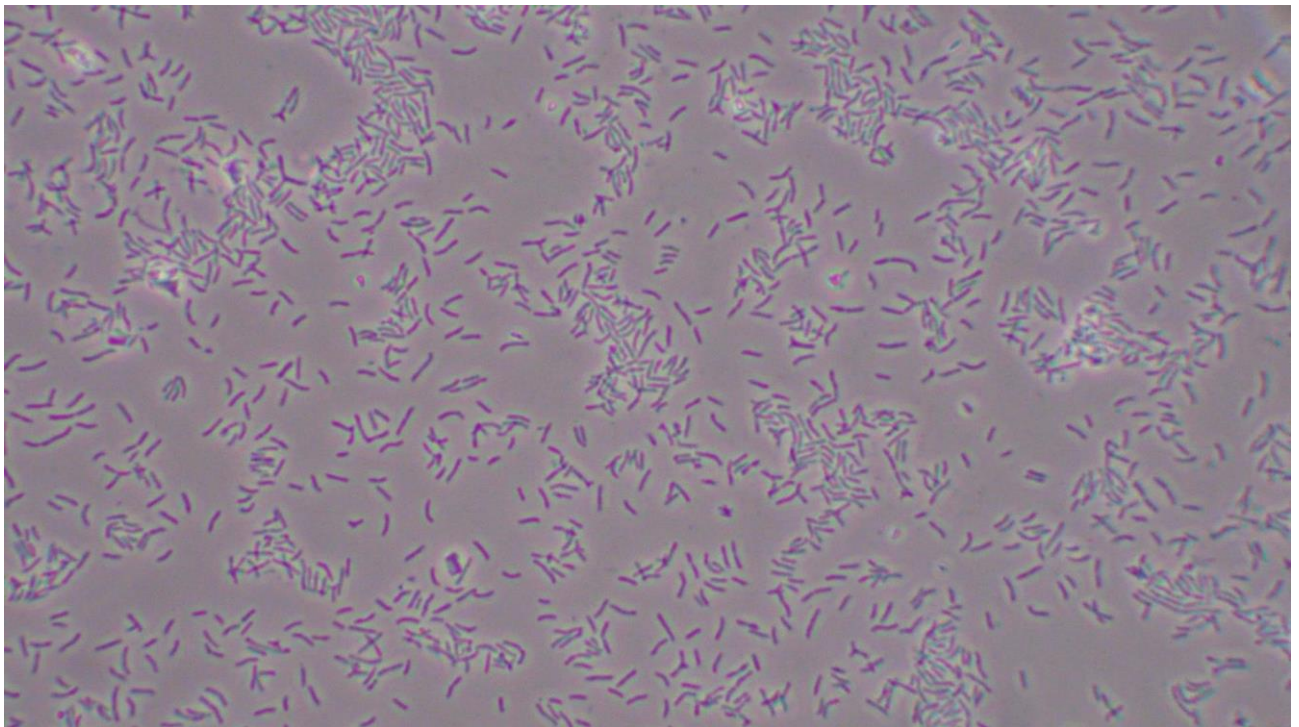

**Figure S4b.** Optical microscope observation of *B. breve* DSM 20213 grown in MRS-cys-LA.
